# Supplementary material for: A Circulating miRNA-Based Scoring System Established by WGCNA to Predict Colon Cancer
Source: Hindawi journal article supplement (doi:10.1155/2019/1571045), 2019-12-01
Supplement: f1 [file 1571045.f1.pdf]

# 1 Supplementary figure

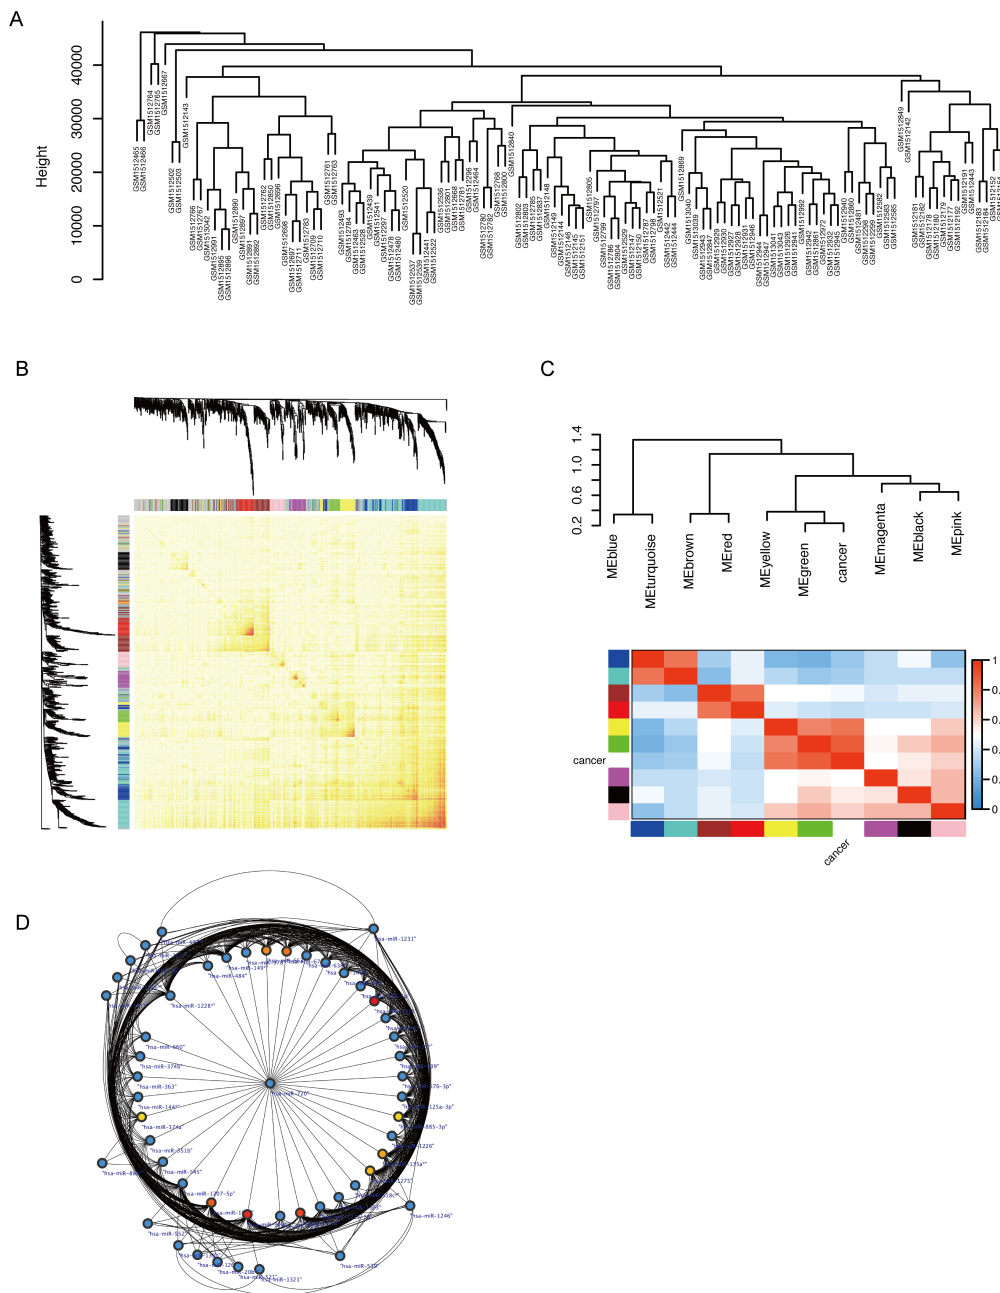

2

3 A. Samples clustering. B. Heatmap proving the independence between each gene. C.  
4 Correlation analysis between gene modules and cancer development. D. MiRNA-  
5 miRNA interaction network in yellow module.
